# Supplementary material for: Cardiac-like flow generator for long-term imaging of endothelial cell responses to circulatory pulsatile flow at microscale
Source: Royal Society of Chemistry journal article supplement (doi:10.1039/c3lc50123j), 2013-01-01
Supplement: c3lc50123j.pdf [file c3lc50123j.pdf]

## Supplementary Figures

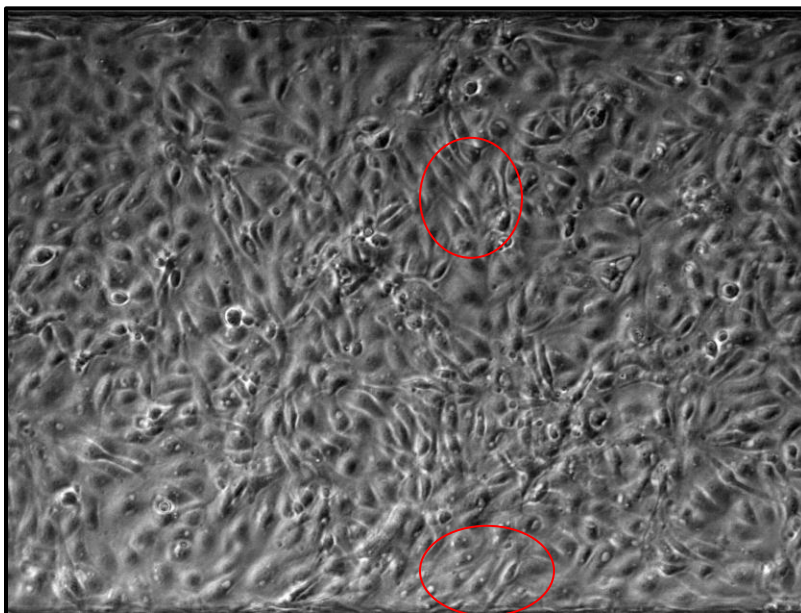

**Supplementary Figure 1.** Flow cell after 48 hours pulsatile shear flow showing an increased number of clustered cells elongated and sharing a similar orientation, however cluster orientation is not along the direction of flow.

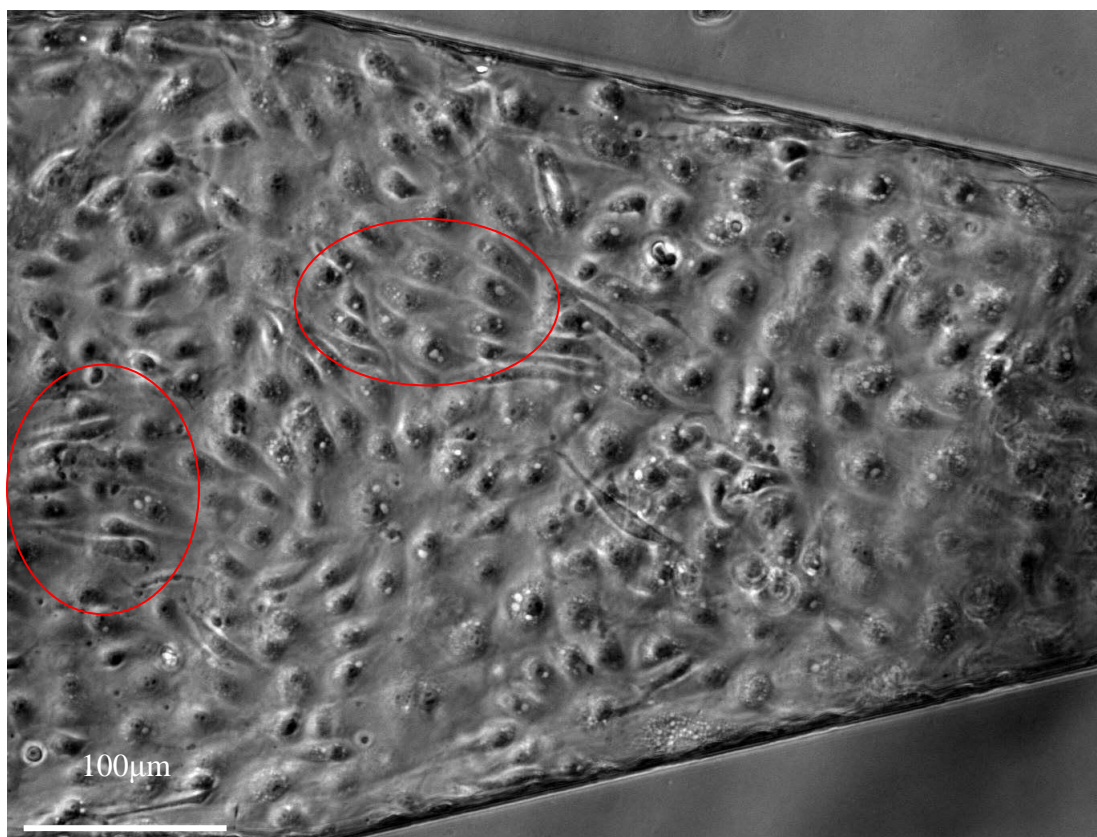

**Supplementary Figure 2** Flow cell after 48 hours pulsatile shear flow near the inlet showing an increased number of clustered cells elongated and sharing a similar orientation along the direction of flow.

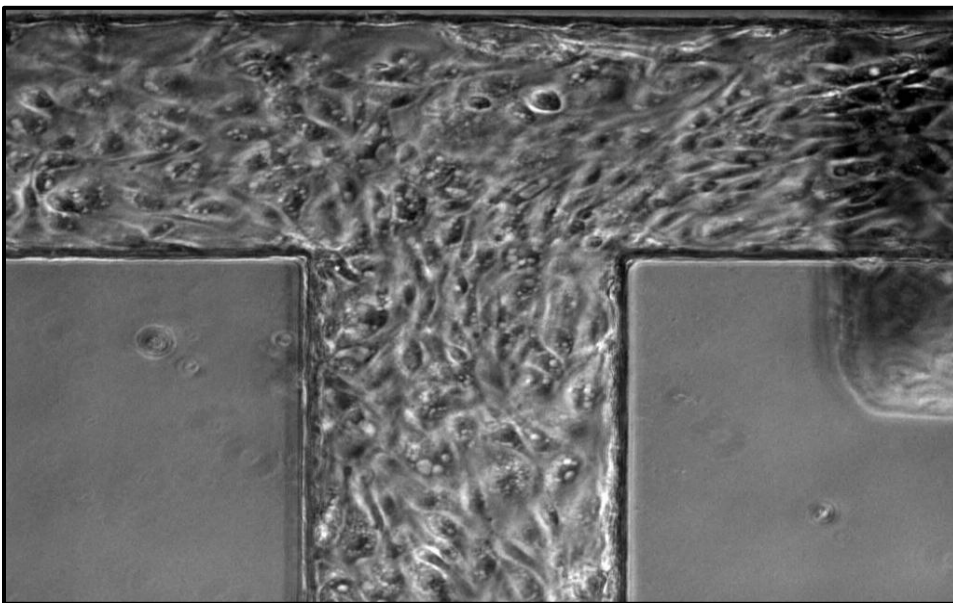

**Supplementary Figure 3** Alignment of EC with flow direction near valve 1 (10x)

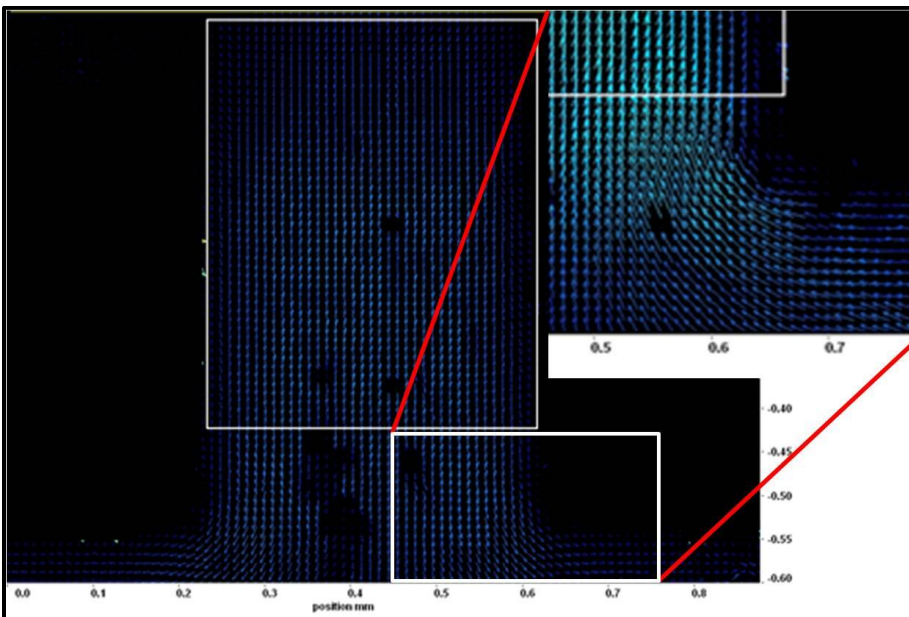

**Supplementary Figure 4.**  $\mu$ -PIV velocity vector plot at the location of valve 1 on the inside of the ventricle

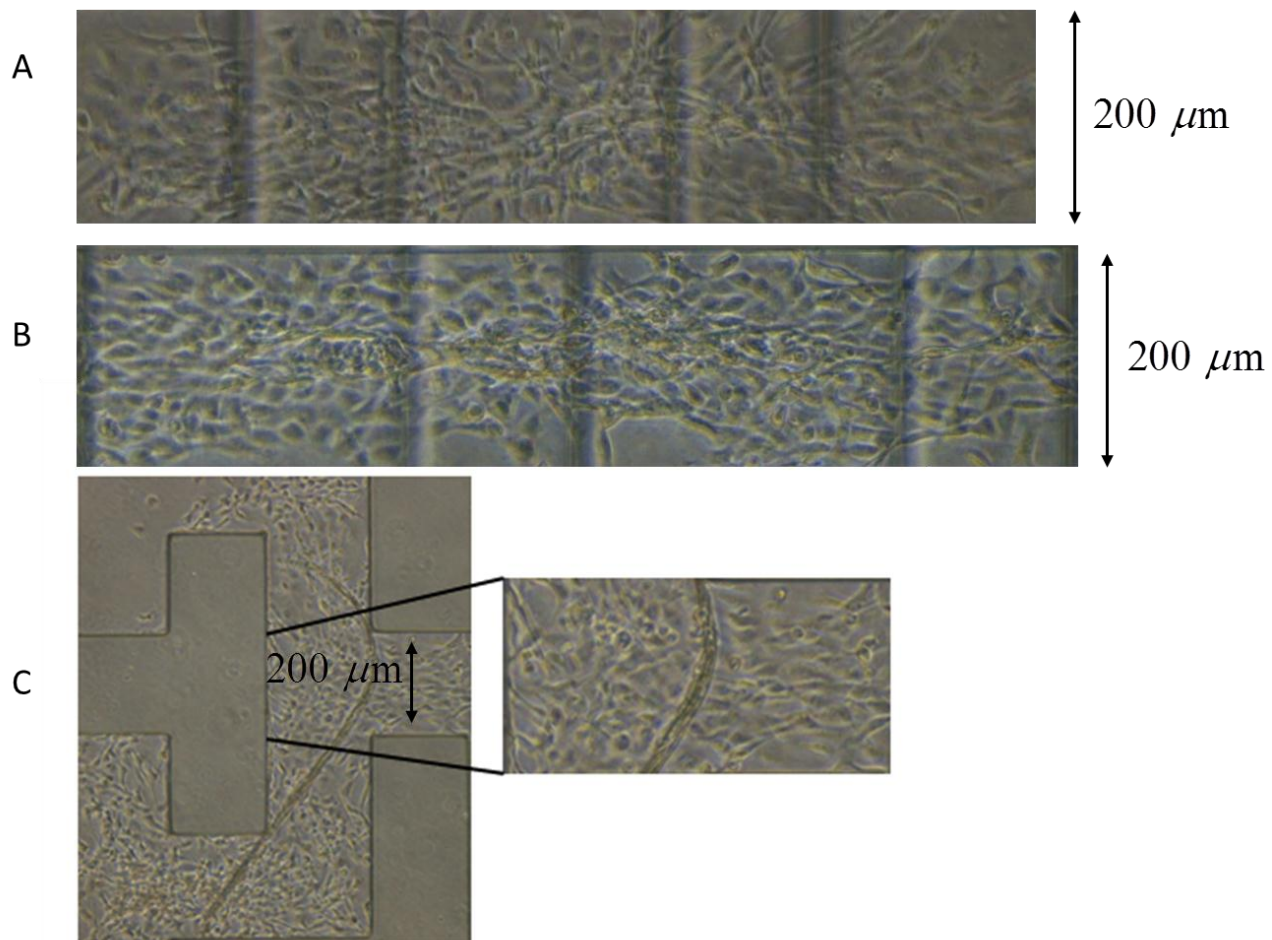

**Supplementary Figure 5** Day 6 static controls showing BAEC morphology inside 200 μm channels. A and B. Parallel 200 μm channel inside ventricle (flow channel is horizontal, vertical channels are pneumatic control) C. Branching network
